# Supplementary material for: An Evaluation of a Simplified Impression Membrane Sampling Method for the Diagnosis of Microbial Keratitis
Source: MDPI journal article supplement (doi:10.3390/jcm10235671), 2021-11-30
Supplement: s1 [file s1]

## Supplementary Data

**Table S1:** Coagulase negative staphylococcus isolates. CIM: Corneal impression membrane.

| Isolated Organism       | Corneal Scrapes<br>(n=1,214) | CIM<br>(n=1,885) | P-value |
|-------------------------|------------------------------|------------------|---------|
| <i>S. epidermidis</i>   | 26 (2.1%)                    | 493 (26.2%)      | <0.001  |
| <i>S. caprae</i>        | 0                            | 1 (0.05%)        | 1.0     |
| <i>S. capitis</i>       | 5 (0.4%)                     | 49 (2.6%)        | <0.001  |
| <i>S. haemolyticus</i>  | 0                            | 8 (0.4%)         | 0.624   |
| <i>S. hominis</i>       | 8 (0.7%)                     | 28 (1.5%)        | 0.936   |
| <i>S. lugdunensis</i>   | 1 (0.1%)                     | 13 (0.7%)        | 0.182   |
| <i>S. pasteurii</i>     | 1 (0.1%)                     | 12 (0.6%)        | 0.504   |
| <i>S. pellenkoferi</i>  | 0                            | 2 (0.1%)         | 1.0     |
| <i>S. saprophyticus</i> | 2 (0.2%)                     | 2 (0.1%)         | 1.0     |
| <i>S. simulans</i>      | 0                            | 2 (0.1%)         | 1.0     |
| <i>S. warneri</i>       | 4 (0.3%)                     | 31 (1.6%)        | <0.001  |
| Unclassified            | 31 (2.6%)                    | 199 (10.6%)      | <0.001  |

## Supplementary Data

**Table S2:** Corneal samples with mixed microorganism growth. CIM: corneal impression membrane; CNS: Coagulase-negative staphylococcus. <sup>a</sup> Other Gram-positive bacteria includes: *Micrococcus* spp., *Rothia* spp., *Aerococcus* spp., *Lysinibacillus* spp., *Corynebacterium* spp., *Diphtheroid* spp. and *Bacillus* spp. <sup>b</sup> Other Gram-negative bacteria includes: *Brevundimonas* spp., *Chryseobacterium* spp., *Acinetobacter* spp., *Haemophilus* spp., *Klebsiella* spp., *Pantoea* spp., *Proteus* sp., *Raoultella* spp., *Stenotrophomonas* spp. and *Alcaligenes* sp. <sup>c</sup> Other fungi includes: *Ulocladium* sp. and *Yeasts*.

|                                                        | Corneal Scrapes<br>(n=30) | CIM<br>(n=272)     | P-value     |
|--------------------------------------------------------|---------------------------|--------------------|-------------|
| <b>Nature of infection</b>                             |                           |                    |             |
| 2 microorganisms isolated                              | 26 (86.7%)                | 241 (88.6%)        | 0.75        |
| 3 microorganisms isolated                              | 4 (13.3%)                 | 30 (11.0%)         | 0.71        |
| >3 microorganisms isolated                             | 0                         | 1 (0.4%)           | 1.00        |
| <b>Gram positive bacteria</b>                          | <b>29 (96.7%)</b>         | <b>265 (97.4%)</b> | <b>0.81</b> |
| CNS                                                    | 20 (66.7%)                | 196 (72.1%)        |             |
| <i>S. aureus</i>                                       | 7 (23.3%)                 | 59 (21.7%)         |             |
| <i>S. pneumoniae</i>                                   | 3 (10.0%)                 | 15 (5.5%)          |             |
| Other <i>Streptococcus</i> species                     | 4 (13.3%)                 | 101 (37.1%)        |             |
| <i>Enterococcus</i> spp.                               | 1 (3.3%)                  | 13 (4.8%)          |             |
| Others <sup>a</sup>                                    | 7 (23.3%)                 | 23 (8.5%)          |             |
| <b>Gram negative</b>                                   | <b>11 (36.7%)</b>         | <b>75 (27.6%)</b>  | <b>0.30</b> |
| <i>Pseudomonas</i> spp.                                | 3 (10.0%)                 | 19 (7.0%)          |             |
| <i>Moraxella</i> spp.                                  | 4 (13.3%)                 | 21 (7.7%)          |             |
| <i>E. coli</i>                                         | 0                         | 9 (3.3%)           |             |
| <i>Serratia</i> spp.                                   | 0                         | 10 (3.7%)          |             |
| Others <sup>b</sup>                                    | 5 (16.7%)                 | 22 (8.1%)          |             |
| <b>Fungi</b>                                           | <b>3 (10.0%)</b>          | <b>10 (3.7%)</b>   | <b>0.13</b> |
| <i>Candida</i> spp.                                    | 2 (6.7%)                  | 3 (1.1%)           |             |
| <i>Pencillium</i> spp.                                 | 1 (3.3%)                  | 3 (1.1%)           |             |
| <i>Aspergillus</i> spp.                                | 0                         | 2 (0.7%)           |             |
| Others <sup>c</sup>                                    | 0                         | 2 (0.7%)           |             |
| <b>Protozoa</b>                                        |                           |                    |             |
| <i>Acanthamoeba</i> spp.                               | <b>0</b>                  | <b>1 (0.4%)</b>    | <b>1.00</b> |
| <b>Microbial growth patterns</b>                       |                           |                    |             |
| Only mixed Gram-positive bacterial growth              | 19 (63.3%)                | 203 (74.6%)        | 0.18        |
| Only mixed Gram-negative bacterial growth              | 1 (3.3%)                  | 9 (3.3%)           | 1.00        |
| Mixed Gram-negative and Gram-positive bacterial growth | 10 (33.3%)                | 71 (26.1%)         | 0.40        |
| Mixed bacterial and fungal growth                      | 3 (10.0%)                 | 10 (3.7%)          | 0.13        |
| Protozoa and bacterial growth                          | 0                         | 1 (0.4%)           | 1.00        |
